# Supplementary material for: Application of the thermostable β-galactosidase, BgaB, from Geobacillus stearothermophilus as a versatile reporter under anaerobic and aerobic conditions
Source: PubMed Central journal article supplement (PMC5585113; doi:10.1186/s13568-017-0469-z), 2017-09-06

# Supplementary materials

## Applied Microbiology and Biotechnology

### **Application of the thermostable $\beta$ -galactosidase, BgaB, from *Geobacillus stearothermophilus* as a versatile reporter under anaerobic and aerobic conditions**

Torbjørn Ølshøj Jensen\*, Ivan Pogrebnyakov\*, Kristoffer Bach Falkenberg, Stephanie Redl, Alex Toftgaard Nielsen†.

\*shared 1st authorship

*The Novo Nordisk Foundation Center for Biosustainability, Technical University of Denmark, Lyngby, Denmark*

†Corresponding author: Alex Toftgaard Nielsen, Kemitorvet Building 220, 2800 Kongens Lyngby, Denmark, +45-45258010, atn@biosustain.dtu.dk

**Fig. S1 Alignment of the promoter sequences arranged according to their activity, with the most active promoter in the top, the black boxes indicate the -35 and -10 regions of the promoter**

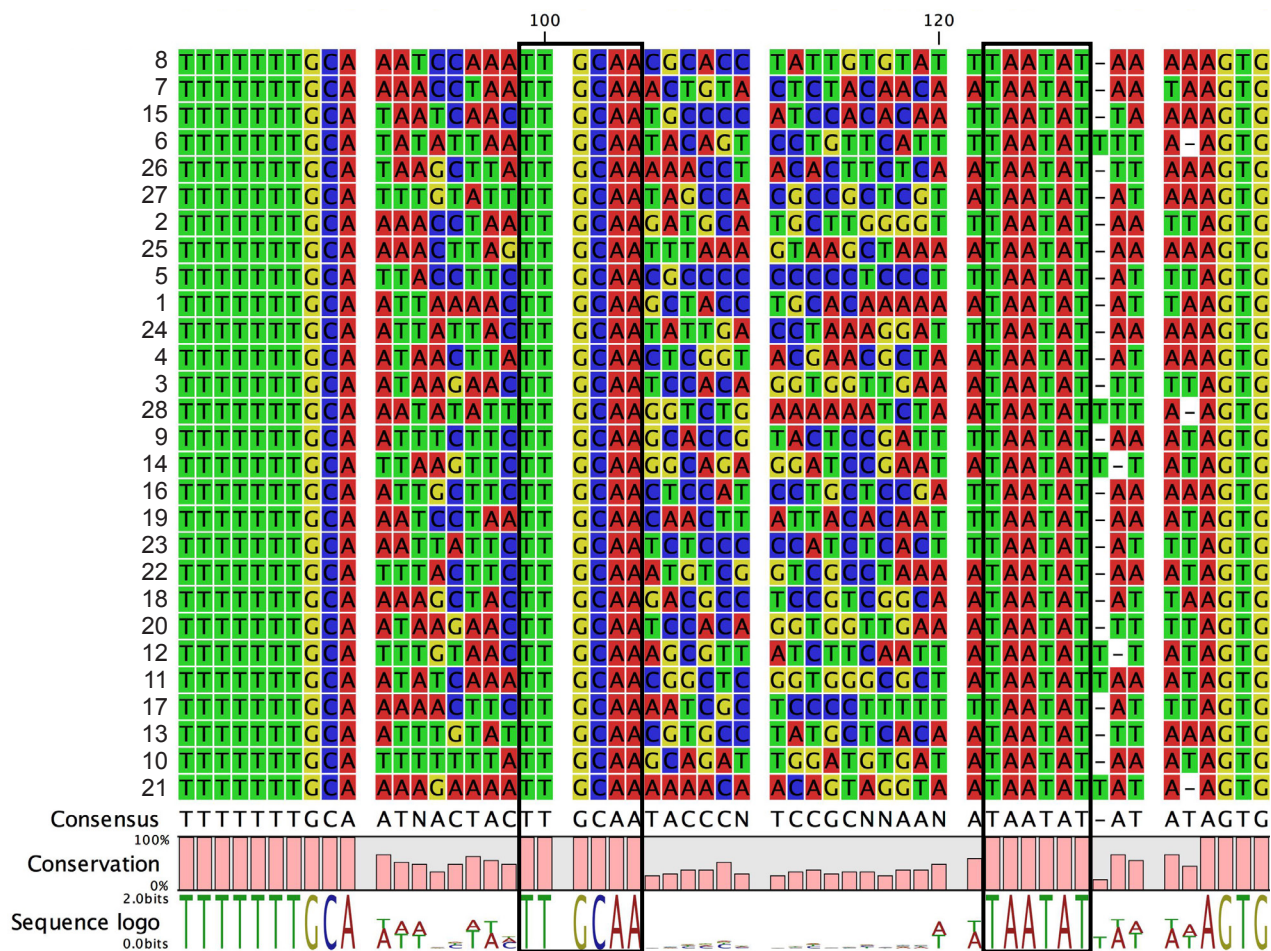

**Fig. S2 Cells expressing  $\beta$ -galactosidase on a medium supplemented with S-gal. a, *E. coli* TOP10 parent strain with empty plasmid and b, *E. coli* TOP10 with *bgaB* expressed from a plasmid**

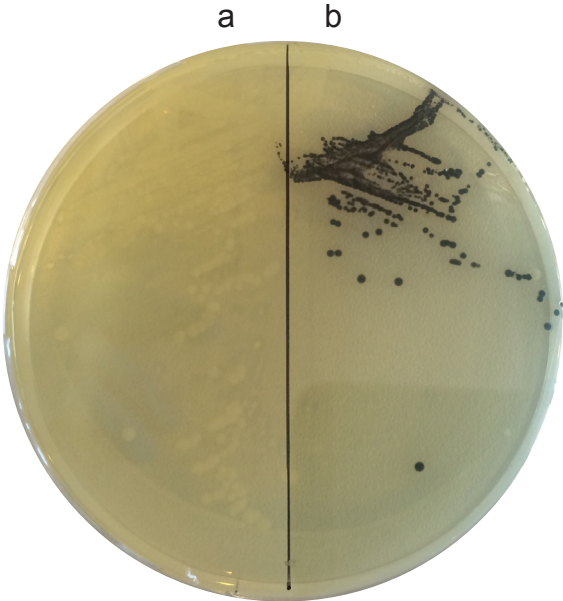

Supplement: 13568_2017_469_MOESM1_ESM.pdf [file 13568_2017_469_MOESM1_ESM.pdf]
